# Supplementary material for: S100A8/9 modulates perturbation and glycolysis of macrophages in allergic asthma mice
Source: PeerJ journal article supplement (doi:10.7717/peerj.17106), 2024-04-18

Figure 2N

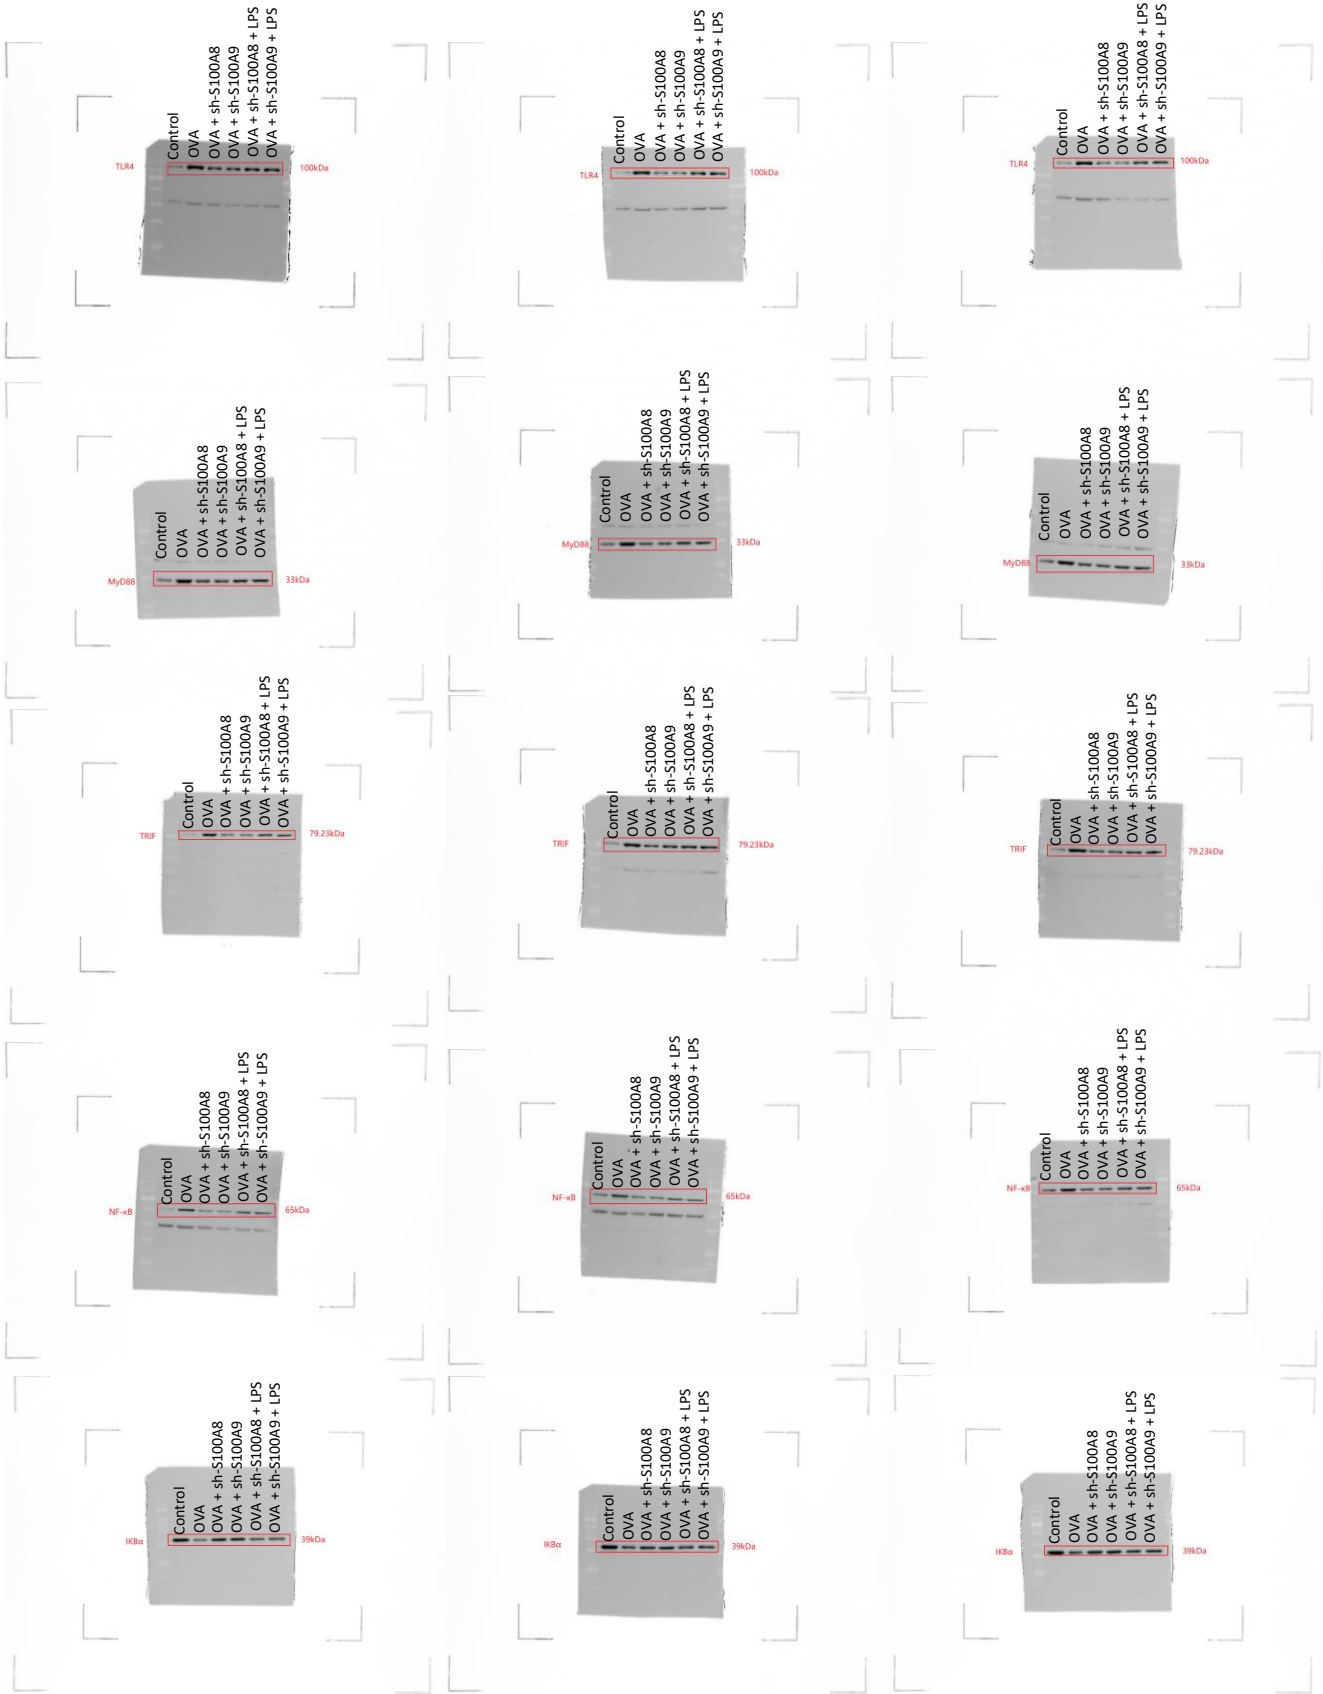

Figure 2N

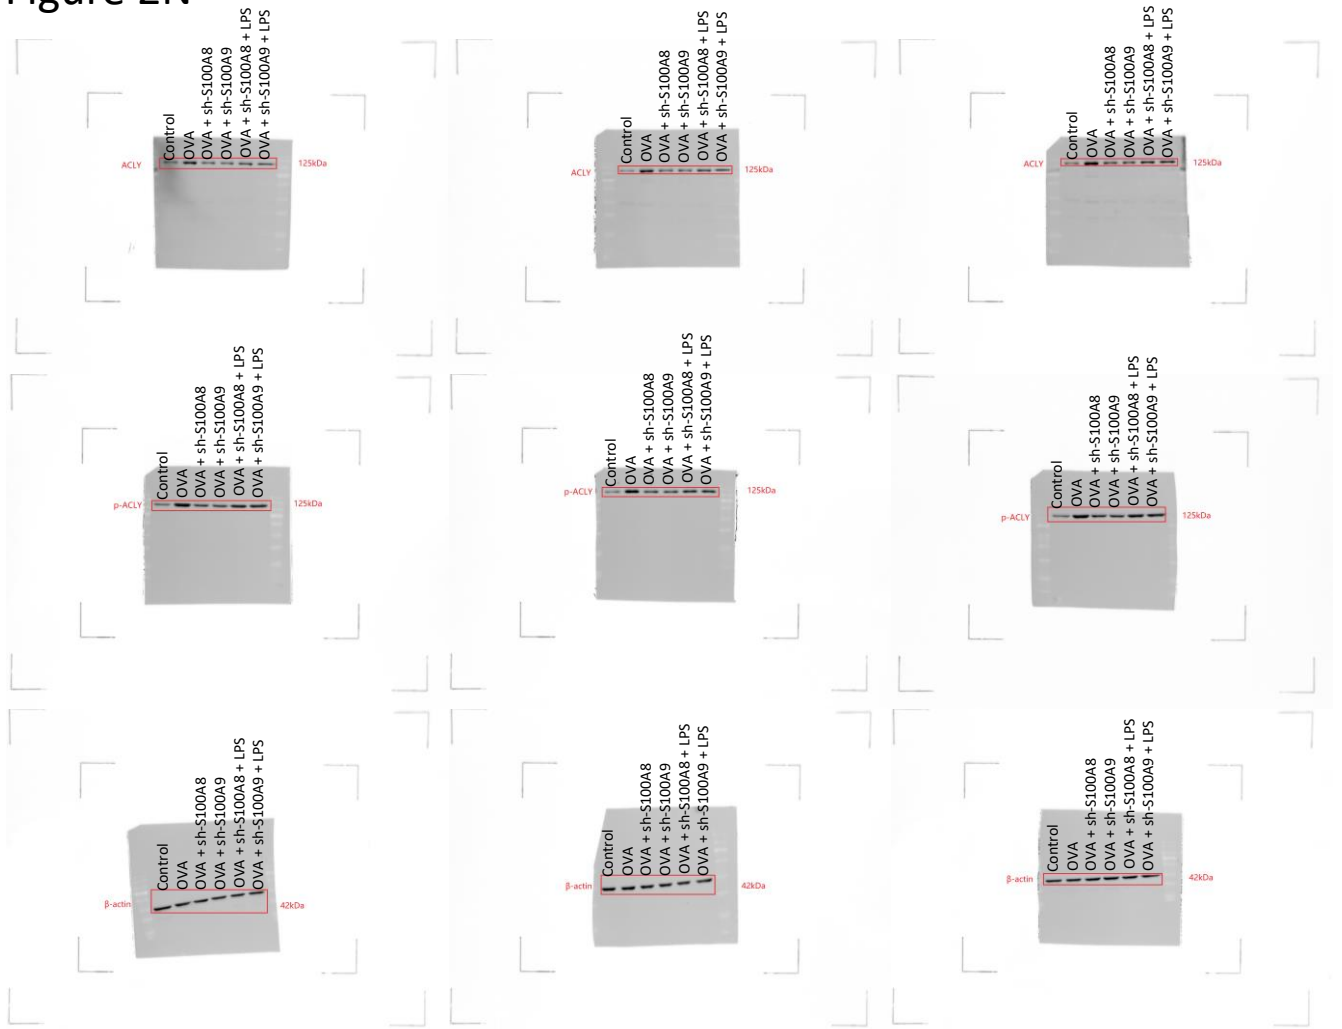

Figure 5M and 8M

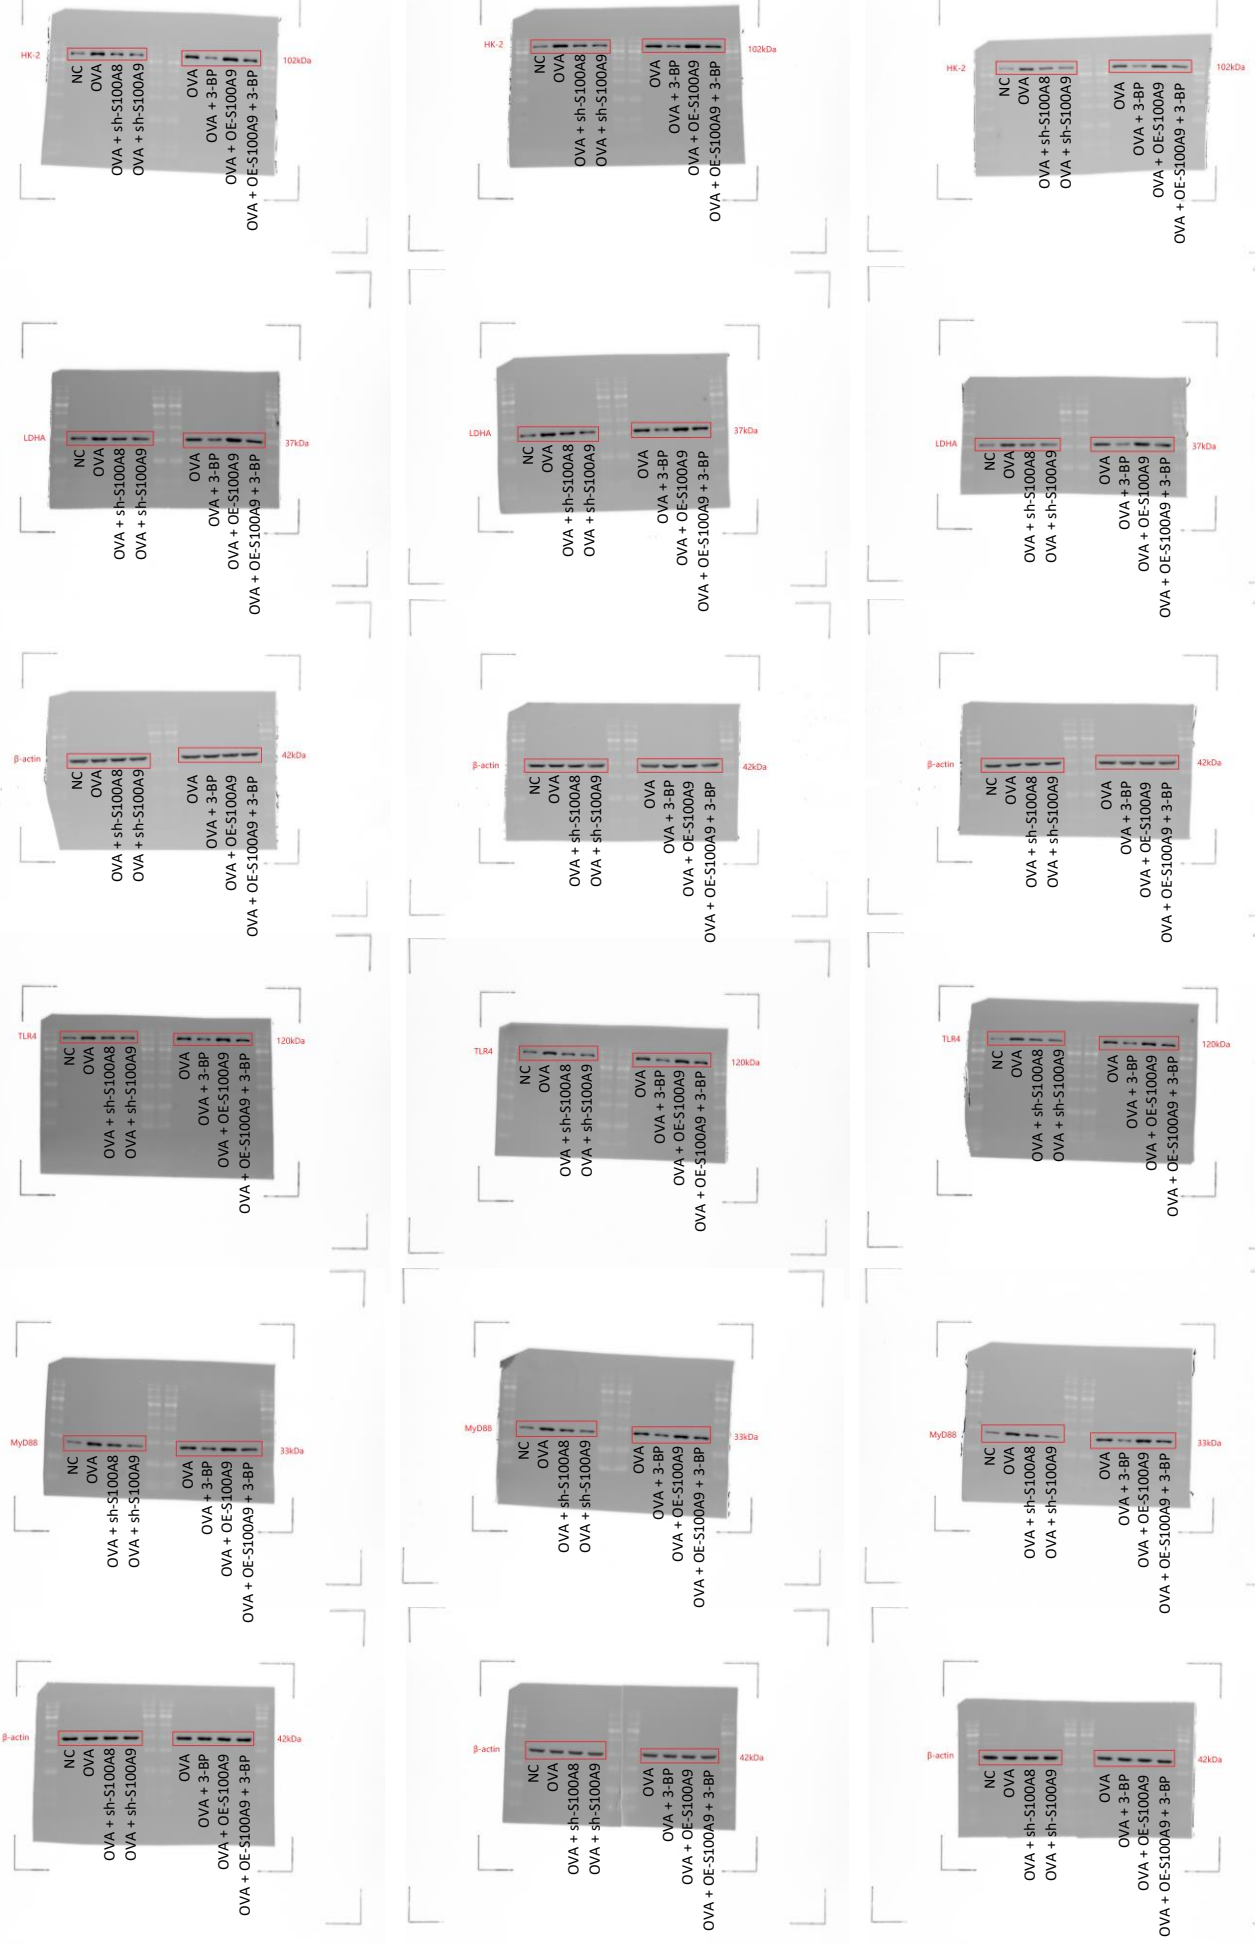

Figure 5M and 8M

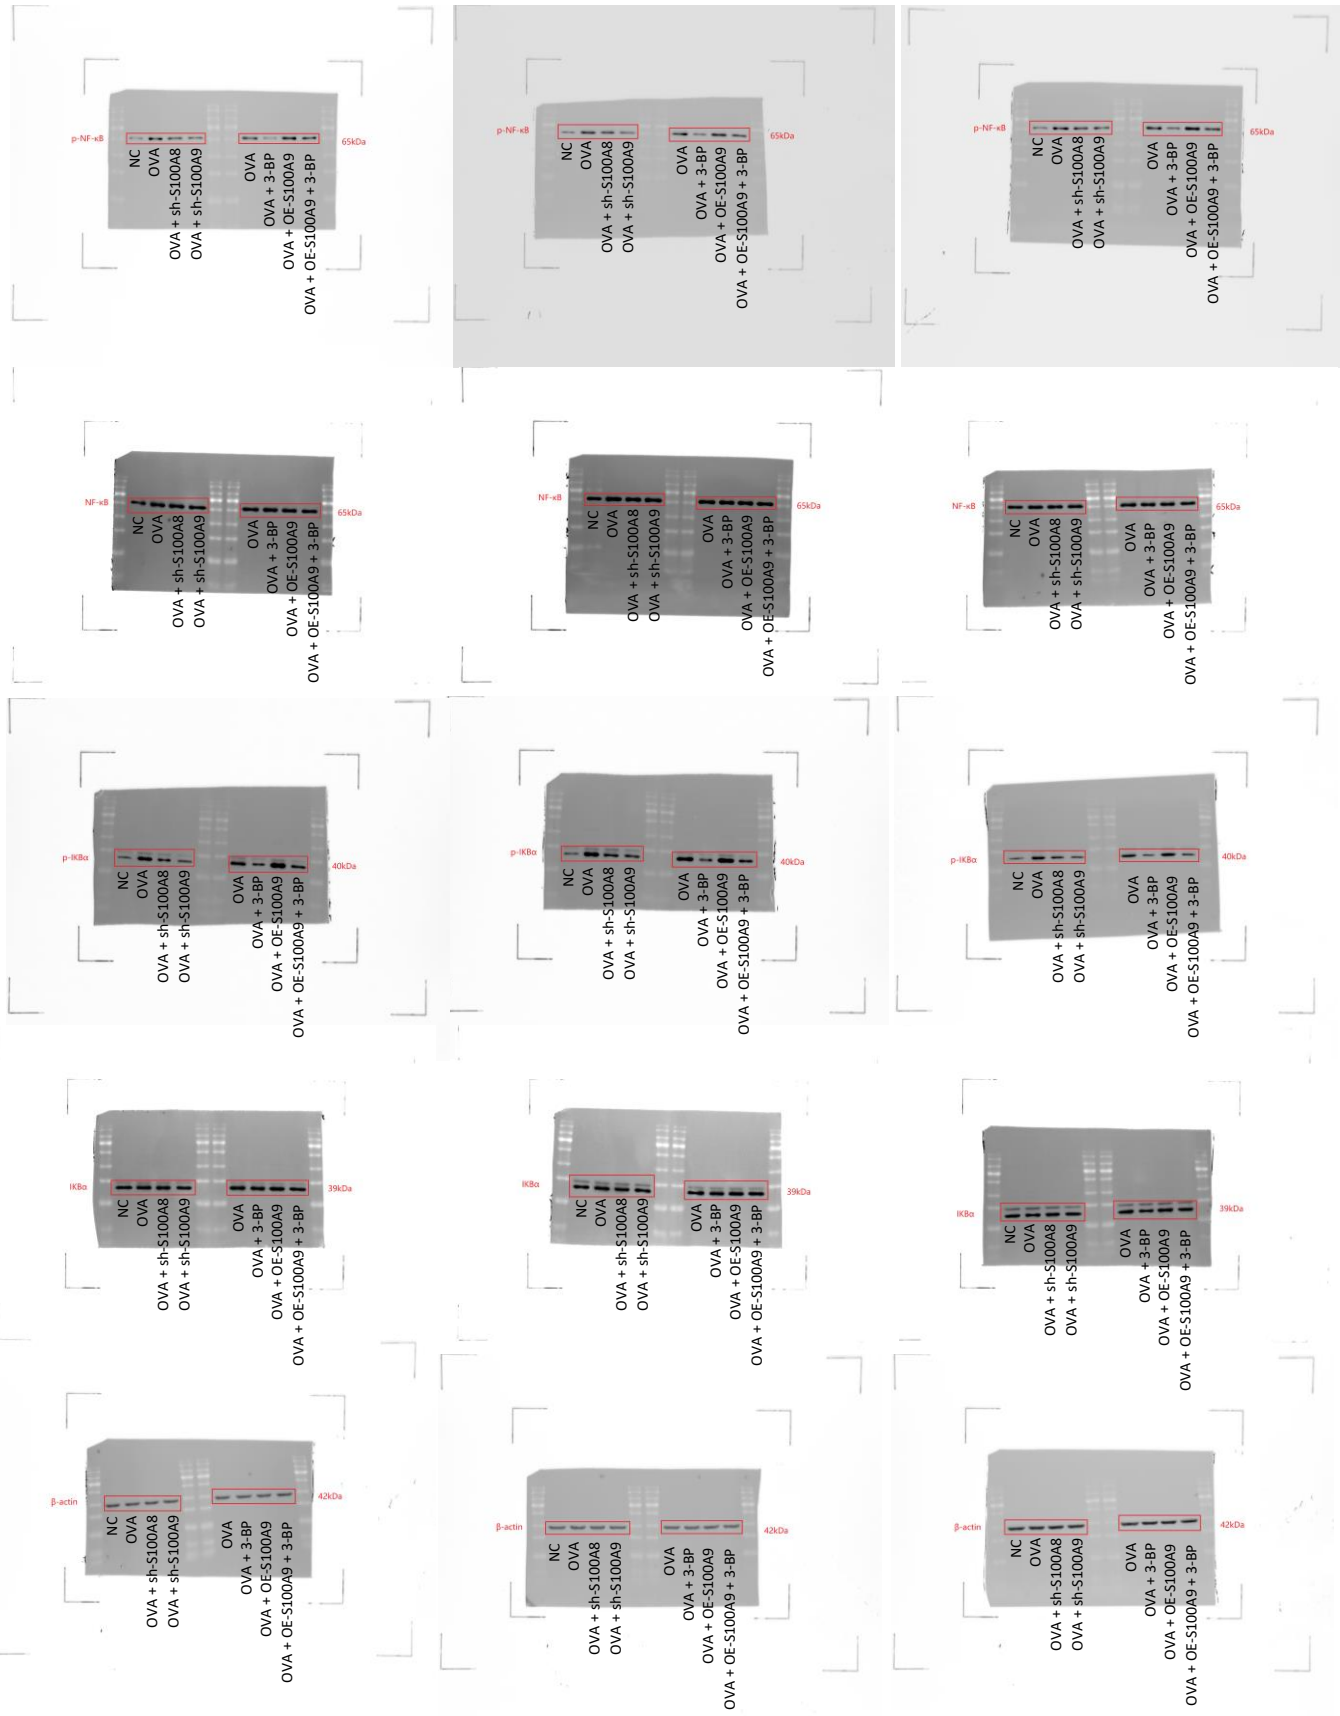

Figure 5M and 8M

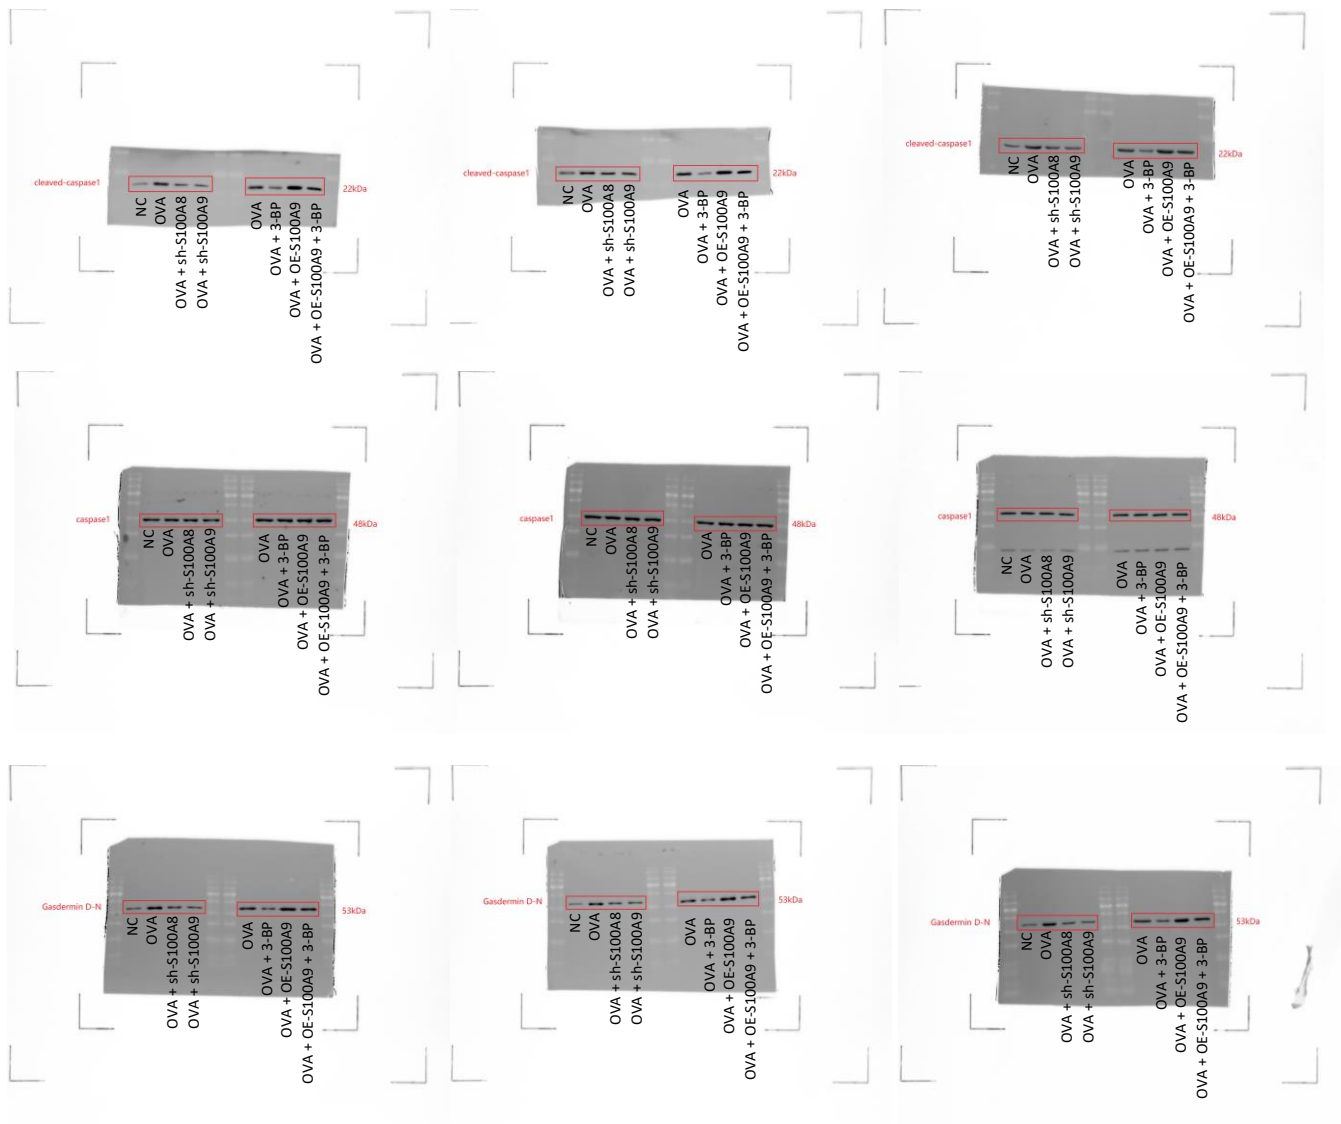

Supplement: Protein_band.pdf [file Protein_band.pdf]
