# Supplementary material for: S100A8/9 modulates perturbation and glycolysis of macrophages in allergic asthma mice
Source: PeerJ. 2024 Apr 18;12:e17106. doi: 10.7717/peerj.17106 (PMC11032659; doi:10.7717/peerj.17106)
Supplement: Supplemental Information 3 — All data used for statistical analysis. [file peerj-12-17106-s003.xlsx]

## Sheet: Table 2
Table 2 Effects of S100A8 and S100A9 knockdown on EACR in MH-S cells with OVA
1min								36 min
ECAR（mpH/min）	Control	OVA	OVA + sh-S100A8	OVA + sh-S100A9	OVA+sh-S100A8+LPS	OVA+sh-S100A9+LPS		ECAR（mpH/min）	Control	OVA	OVA + sh-S100A8	OVA + sh-S100A9	OVA+sh-S100A8+LPS	OVA+sh-S100A9+LPS
1	64.41	70.05	74.26	68.17	80.35	72.5		1	64.41	70.05	74.26	68.17	80.35	72.5
2	61.66	90.31	65.99	72.09	92.9	83.94		2	61.66	90.31	65.99	72.09	92.9	83.94
3	73.47	79.94	76.41	61.3	87.09	78.42		3	73.47	79.94	76.41	61.3	87.09	78.42
4	66.35	74.87	81.02	67.93	95.73	82.63		4	66.35	74.87	81.02	67.93	95.73	82.63
5	63.52	88.15	80.18	72.11	80.26	79.65		5	63.52	88.15	80.18	72.11	80.26	79.65
6	64.64	78.64	75.31	78.96	84.18	64.74		6	64.64	78.64	75.31	78.96	84.18	64.74
9 min								45 min
ECAR（mpH/min）	Control	OVA	OVA + sh-S100A8	OVA + sh-S100A9	OVA+sh-S100A8+LPS	OVA+sh-S100A9+LPS		ECAR（mpH/min）	Control	OVA	OVA + sh-S100A8	OVA + sh-S100A9	OVA+sh-S100A8+LPS	OVA+sh-S100A9+LPS
1	64.41	70.05	74.26	68.17	80.35	72.5		1	64.41	70.05	74.26	68.17	80.35	72.5
2	61.66	90.31	65.99	72.09	92.9	83.94		2	61.66	90.31	65.99	72.09	92.9	83.94
3	73.47	79.94	76.41	61.3	87.09	78.42		3	73.47	79.94	76.41	61.3	87.09	78.42
4	66.35	74.87	81.02	67.93	95.73	82.63		4	66.35	74.87	81.02	67.93	95.73	82.63
5	63.52	88.15	80.18	72.11	80.26	79.65		5	63.52	88.15	80.18	72.11	80.26	79.65
6	64.64	78.64	75.31	78.96	84.18	64.74		6	64.64	78.64	75.31	78.96	84.18	64.74
18 min								54 min
ECAR（mpH/min）	Control	OVA	OVA + sh-S100A8	OVA + sh-S100A9	OVA+sh-S100A8+LPS	OVA+sh-S100A9+LPS		ECAR（mpH/min）	Control	OVA	OVA + sh-S100A8	OVA + sh-S100A9	OVA+sh-S100A8+LPS	OVA+sh-S100A9+LPS
1	64.41	70.05	74.26	68.17	80.35	72.5		1	64.41	70.05	74.26	68.17	80.35	72.5
2	61.66	90.31	65.99	72.09	92.9	83.94		2	61.66	90.31	65.99	72.09	92.9	83.94
3	73.47	79.94	76.41	61.3	87.09	78.42		3	73.47	79.94	76.41	61.3	87.09	78.42
4	66.35	74.87	81.02	67.93	95.73	82.63		4	66.35	74.87	81.02	67.93	95.73	82.63
5	63.52	88.15	80.18	72.11	80.26	79.65		5	63.52	88.15	80.18	72.11	80.26	79.65
6	64.64	78.64	75.31	78.96	84.18	64.74		6	64.64	78.64	75.31	78.96	84.18	64.74
27 min								63 min
ECAR（mpH/min）	Control	OVA	OVA + sh-S100A8	OVA + sh-S100A9	OVA+sh-S100A8+LPS	OVA+sh-S100A9+LPS		ECAR（mpH/min）	Control	OVA	OVA + sh-S100A8	OVA + sh-S100A9	OVA+sh-S100A8+LPS	OVA+sh-S100A9+LPS
1	64.41	70.05	74.26	68.17	80.35	72.5		1	64.41	70.05	74.26	68.17	80.35	72.5
2	61.66	90.31	65.99	72.09	92.9	83.94		2	61.66	90.31	65.99	72.09	92.9	83.94
3	73.47	79.94	76.41	61.3	87.09	78.42		3	73.47	79.94	76.41	61.3	87.09	78.42
4	66.35	74.87	81.02	67.93	95.73	82.63		4	66.35	74.87	81.02	67.93	95.73	82.63
5	63.52	88.15	80.18	72.11	80.26	79.65		5	63.52	88.15	80.18	72.11	80.26	79.65
6	64.64	78.64	75.31	78.96	84.18	64.74		6	64.64	78.64	75.31	78.96	84.18	64.74

## Sheet: Figure 1
Figure 1 S100A8/9 knockdown inhibited polarization and pyroptosis of mouse alveolar macrophages with ovalbumin intervention.
Figure 1A
qRT-PCR	Control	OVA	OVA + sh-S100A8	OVA + sh-S100A9	amplification curve		melting curve
S100A8	17.23	16.06	18.65	17.89
S100A8	17.08	16.08	18.58	17.94
S100A8	17.01	16.05	18.16	17.81
β-actin	15.92	15.85	15.88	15.93
β-actin	16.01	15.89	16.12	16.03
β-actin	16.11	15.9	15.95	15.88
Figure 1B
qRT-PCR	Control	OVA	OVA + sh-S100A8	OVA + sh-S100A9	amplification curve		melting curve
S100A9	22.57	21.95	22.22	23.34
S100A9	22.52	21.87	22.33	23.33
S100A9	22.54	21.87	22.27	23.31
β-actin	15.92	15.85	15.88	15.93
β-actin	16.01	15.89	16.12	16.03
β-actin	16.11	15.9	15.95	15.88
Figure 1C									Figure 1D									Figure 1E
ELISA		Control	OVA	OVA + sh-S100A8	OVA + sh-S100A9	OVA+sh-S100A8+LPS	OVA+sh-S100A9+LPS		ELISA		Control	OVA	OVA + sh-S100A8	OVA + sh-S100A9	OVA+sh-S100A8+LPS	OVA+sh-S100A9+LPS		ELISA		Control	OVA	OVA + sh-S100A8	OVA + sh-S100A9	OVA+sh-S100A8+LPS	OVA+sh-S100A9+LPS
IL-1β (pg/mL)	1	236.727	366.016	348.894	330.05	340.744	326.955		IL-6 (pg/mL)	1	128.147	309.024	172.244	206.81	209.956	214.259		TNF-α (pg/mL)	1	1	163.229	364.658	231.951	266.126	279.964
	2	248.1	456.72	314.612	295.109	386.874	375.301			2	126.62	265.205	179.231	187.19	204.866	250.074			2	2	162.115	392.612	241.517	275.413	314.324
	3	203.013	455.731	312.323	318.952	339.975	354.113			3	126.019	253.128	208.66	175.437	236.562	236.285			3	3	189.047	359.922	262.597	266.405	305.781
	4	213.287	421.962	283.974	294.981	352.153	383.194			4	149.664	275.616	176.177	189.041	219.488	199.499			4	4	168.337	417.779	248.667	241.795	348.035
	5	225.74	428.335	300.841	331.386	388.431	383.523			5	125.834	284.546	197.601	202.229	243.272	228.974			5	5	158.493	326.583	285.164	231.487	318.875
Figure 1F												Figure 1G
qRT-PCR	Control	OVA	OVA + sh-S100A8	OVA + sh-S100A9	OVA+sh-S100A8+LPS	OVA+sh-S100A9+LPS	amplification curve		melting curve			qRT-PCR	Control	OVA	OVA + sh-S100A8	OVA + sh-S100A9	OVA+sh-S100A8+LPS	OVA+sh-S100A9+LPS	amplification curve		melting curve
IL-1β	24.27	23	23.7	23.88	23.35	23.32						IL-6	17.92	17.19	17.87	17.72	17.31	17.33
IL-1β	24.1	22.85	23.85	23.9	23.41	23.31						IL-6	18.17	17.17	17.88	17.52	17.47	17.35
IL-1β	23.99	22.96	23.94	23.72	23.36	23.32						IL-6	18.33	17.16	17.79	17.81	17.4	17.43
β-actin	18.53	18.54	18.65	18.57	18.53	18.53						β-actin	18.71	18.76	18.95	18.61	18.8	18.75
β-actin	18.52	18.55	18.52	18.54	18.58	18.52						β-actin	18.76	18.87	18.68	18.66	18.73	18.67
β-actin	18.56	18.48	18.62	18.6	18.51	18.34						β-actin	18.89	18.75	18.74	18.74	18.68	18.66
Figure 1H												Figure 1I
qRT-PCR	Control	OVA	OVA + sh-S100A8	OVA + sh-S100A9	OVA+sh-S100A8+LPS	OVA+sh-S100A9+LPS	amplification curve		melting curve			qRT-PCR	Control	OVA	OVA + sh-S100A8	OVA + sh-S100A9	OVA+sh-S100A8+LPS	OVA+sh-S100A9+LPS	amplification curve		melting curve
IL-10	21.53	23.14	21.01	20.81	22.89	22.09						iNOS	21.95	20.84	21.65	21.56	21.16	21.17
IL-10	21.38	23.3	21.04	20.91	22.68	22.08						iNOS	22.1	20.88	21.59	21.57	21.12	21.17
IL-10	21.59	23.4	21.01	20.58	22.77	22.07						iNOS	22.13	20.95	21.62	21.8	21.25	21.28
β-actin	15.92	15.85	15.88	15.93	15.9	16.02						β-actin	18.71	18.76	18.95	18.61	18.8	18.75
β-actin	16.01	15.89	16.12	16.03	15.98	15.97						β-actin	18.76	18.87	18.68	18.66	18.73	18.67
β-actin	16.11	15.9	15.95	15.88	15.91	16						β-actin	18.89	18.75	18.74	18.74	18.68	18.66
Figure 1J												Figure 1K
qRT-PCR	Control	OVA	OVA + sh-S100A8	OVA + sh-S100A9	OVA+sh-S100A8+LPS	OVA+sh-S100A9+LPS	amplification curve		melting curve			qRT-PCR	Control	OVA	OVA + sh-S100A8	OVA + sh-S100A9	OVA+sh-S100A8+LPS	OVA+sh-S100A9+LPS	amplification curve		melting curve
Arg1	25.84	24.4	25.18	25.1	24.79	24.77						Fizz1	24.34	23.1	24.29	23.81	23.59	23.52
Arg1	25.7	24.26	25.08	25.19	24.74	24.74						Fizz1	24.36	23.09	24.12	23.98	23.67	23.49
Arg1	25.64	24.36	25.17	25.08	24.83	24.76						Fizz1	24.27	23.25	24.15	23.86	23.47	23.48
β-actin	18.43	18.45	18.52	18.51	18.52	18.38						β-actin	18.71	18.76	18.95	18.61	18.8	18.75
β-actin	18.42	18.54	18.46	18.52	18.5	18.55						β-actin	18.76	18.87	18.68	18.66	18.73	18.67
β-actin	18.47	18.44	18.53	18.45	18.4	18.6						β-actin	18.89	18.75	18.74	18.74	18.68	18.66
Figure 1M
flow cytometry		Control	OVA	OVA + sh-S100A8	OVA + sh-S100A9	OVA+sh-S100A8+LPS	OVA+sh-S100A9+LPS	flow cytometry		Control	OVA	OVA + sh-S100A8	OVA + sh-S100A9	OVA+sh-S100A8+LPS	OVA+sh-S100A9+LPS
M1 [F4/80+CD86+(%)]	1	0.24	29	15.4	14.9	38.3	33.3	M2 [F4/80+CD206+(%)]	1	0.24	29	15.4	14.9	38.3	33.3
	2	0.21	28.2	12.1	14.4	35.7	34.9		2	0.21	28.2	12.1	14.4	35.7	34.9
	3	0.2	30.4	13	16.7	37	35.8		3	0.2	30.4	13	16.7	37	35.8
Figure 1N
flow cytometry		Control	OVA	OVA + sh-S100A8	OVA + sh-S100A9	OVA+sh-S100A8+LPS	OVA+sh-S100A9+LPS
pyroptosis (%)	1	1.31	22.5	13.4	13.1	28.2	27.1
	2	1.61	20.2	16.7	11.9	26.1	29.4
	3	1.73	19.5	15.7	14.2	23.8	30.8

## Sheet: Figure 2
Figure 2 S100A8/9 knockdown inhibited glycolysis of mouse alveolar macrophages with ovalbumin intervention.
Figure 2A									Figure 2B									Figure 2C
spectrophotometer		Control	OVA	OVA + sh-S100A8	OVA + sh-S100A9	OVA+sh-S100A8+LPS	OVA+sh-S100A9+LPS		spectrophotometer		Control	OVA	OVA + sh-S100A8	OVA + sh-S100A9	OVA+sh-S100A8+LPS	OVA+sh-S100A9+LPS		spectrophotometer		Control	OVA	OVA + sh-S100A8	OVA + sh-S100A9	OVA+sh-S100A8+LPS	OVA+sh-S100A9+LPS
Lactic acid (μmol/mL)	1	7.58157	15.4702	11.558	11.8086	15.1777	14.5159		PFK (U/10^4 cells)	1	0.83916	1.30104	0.90513	1.0134	1.37853	1.36377		HK (U/10^4 cells)	1	0.45758	1.14212	0.66707	0.751946	1.13595	1.15189
	2	8.27962	14.8884	13.105	9.80345	13.6192	13.2673			2	0.86517	1.24587	0.92313	0.85887	1.24587	1.28448			2	0.445363	1.13453	0.772907	0.808915	1.40549	1.22699
	3	7.72003	17.4655	10.6886	12.4671	12.4053	15.4925			3	0.77202	1.14876	0.83223	1.01142	1.4364	1.2951			3	0.474298	1.15356	0.719538	0.742686	1.23458	1.29875
	4	8.64966	18.6374	11.1715	10.4941	14.6271	13.0398			4	0.8451	1.31049	0.83601	1.01799	1.29204	1.33866			4	0.485872	1.31187	0.754389	0.646365	1.28576	1.16797
	5	8.84415	17.2133	10.499	13.0992	13.0464	13.3093			5	0.80703	1.2672	0.8973	0.98541	1.40913	1.35639			5	0.406526	1.20179	0.706164	0.769821	1.16218	1.10084
										6	0.86274	1.25217	0.86004	0.84168	1.43109	1.26954			6	0.45205	1.00554	0.641092	0.759533	1.3138	1.16861
Figure 2D												Figure 2E
qRT-PCR	Control	OVA	OVA + sh-S100A8	OVA + sh-S100A9	OVA+sh-S100A8+LPS	OVA+sh-S100A9+LPS	amplification curve		melting curve			qRT-PCR	Control	OVA	OVA + sh-S100A8	OVA + sh-S100A9	OVA+sh-S100A8+LPS	OVA+sh-S100A9+LPS	amplification curve		melting curve
GAPDH	17.32	15.56	16.12	16.38	15.8	16.11						HK2	22.31	21.15	22.07	22.25	21.63	21.87
GAPDH	17.16	15.58	16.38	16.38	16.04	15.98						HK2	22.32	21.19	22.13	22.29	21.9	21.76
GAPDH	17.43	15.6	16.38	16.3	16.08	16.17						HK2	22.35	21.14	22.13	22.24	21.59	21.78
HPRT	16.04	16.07	15.96	16	16.05	16.16						HPRT	16.33	16.39	16.27	16.35	16.41	16.62
HPRT	16.05	16.01	16.03	16.06	16.11	16.14						HPRT	16.29	16.26	16.37	16.63	16.43	16.26
HPRT	16.05	15.94	16.04	16.04	16.12	16.24						HPRT	16.42	16.31	16.57	16.39	16.33	16.52
Figure 2F												Figure 2G
qRT-PCR	Control	OVA	OVA + sh-S100A8	OVA + sh-S100A9	OVA+sh-S100A8+LPS	OVA+sh-S100A9+LPS	amplification curve		melting curve			qRT-PCR	Control	OVA	OVA + sh-S100A8	OVA + sh-S100A9	OVA+sh-S100A8+LPS	OVA+sh-S100A9+LPS	amplification curve		melting curve
LDHA	23.61	22.43	23.15	23.32	22.86	23.03			#VALUE!			PDH	21.75	23.36	22.11	21.99	22.46	22.39
LDHA	23.58	22.22	23.08	23.16	22.95	23						PDH	21.79	23.24	22.04	22.11	22.45	22.42
LDHA	23.44	22.11	23.39	23.43	22.75	22.86						PDH	21.7	22.98	22.06	21.97	22.43	22.39
HPRT	16.04	16.07	15.96	16	16.05	16.16						HPRT	16.04	16.07	15.96	16	16.05	16.16
HPRT	16.05	16.01	16.03	16.06	16.11	16.14						HPRT	16.05	16.01	16.03	16.06	16.11	16.14
HPRT	16.05	15.94	16.04	16.04	16.12	16.24						HPRT	16.05	15.94	16.04	16.04	16.12	16.24
Figure 2H								Figure 2I
Western blot	Control	OVA	OVA + sh-S100A8	OVA + sh-S100A9	OVA+sh-S100A8+LPS	OVA+sh-S100A9+LPS		Western blot	Control	OVA	OVA + sh-S100A8	OVA + sh-S100A9	OVA+sh-S100A8+LPS	OVA+sh-S100A9+LPS
TLR4/β-actin	1.21232	5.30873	2.13522	1.91514	3.61239	3.46646		MyD88/β-actin	0.491776	1.30547	0.702736	0.766153	0.886023	0.964338
TLR4/β-actin	0.559782	5.14542	2.24436	2.39665	4.7876	4.511		MyD88/β-actin	0.41008	1.26244	0.609177	0.713424	0.897724	0.969357
TLR4/β-actin	1.2279	5.70236	2.71179	2.63984	3.57399	4.04987		MyD88/β-actin	0.570944	1.39639	0.583718	0.639342	0.774532	0.925698
Figure 2J								Figure 2K
Western blot	Control	OVA	OVA + sh-S100A8	OVA + sh-S100A9	OVA+sh-S100A8+LPS	OVA+sh-S100A9+LPS		Western blot	Control	OVA	OVA + sh-S100A8	OVA + sh-S100A9	OVA+sh-S100A8+LPS	OVA+sh-S100A9+LPS
TRIF/β-actin	0.206755	1.24962	0.443833	0.392328	0.79853	0.839837		NF-κB/β-actin	0.5532	1.26053	0.601575	0.590997	0.932387	0.807166
TRIF/β-actin	0.26035	1.20171	0.492349	0.722734	1.01843	0.963553		NF-κB/β-actin	0.147758	1.23724	0.470198	0.329657	1.02588	0.880375
TRIF/β-actin	0.325577	1.47626	0.458849	0.526383	0.685389	0.858983		NF-κB/β-actin	0.448458	1.34333	0.465144	0.466006	0.765903	0.743326
Figure 2L								Figure 2M
Western blot	Control	OVA	OVA + sh-S100A8	OVA + sh-S100A9	OVA+sh-S100A8+LPS	OVA+sh-S100A9+LPS		Western blot	Control	OVA	OVA + sh-S100A8	OVA + sh-S100A9	OVA+sh-S100A8+LPS	OVA+sh-S100A9+LPS
IκBα/β-actin	1.32533	0.385854	1.07451	1.15601	0.63714	0.786158		p-ACLY/ACLY	0.719723	1.88636	0.811603	0.722759	1.45923	1.42815
IκBα/β-actin	1.15126	0.44976	0.928678	1.0264	0.787782	0.81684		p-ACLY/ACLY	0.900843	2.38426	1.11324	0.969202	1.60671	1.65433
IκBα/β-actin	1.3717	0.427013	0.900226	0.960923	0.590176	0.819494		p-ACLY/ACLY	0.872397	2.0335	1.17368	1.18747	1.5896	1.6681

## Sheet: Figure 3
Figure 3 S100A8/9 knockdown improved respiratory function, lung tissue injury and inflammation of broncho-alveolar lavage fluid in ovalbumin-sensitized and challenged mice.
Figure 3A									Figure 3B
qRT-PCR	NC	OVA	OVA + sh-S100A8	amplification curve		melting curve			qRT-PCR	NC	OVA	OVA + sh-S100A9	amplification curve		melting curve
S100A8	17.23	16.06	18.65						S100A9	22.7	22.05	23.29
S100A8	17.08	16.08	18.58						S100A9	22.78	22.1	23.21
S100A8	17.01	16.05	18.16						S100A9	22.7	21.95	23.24
β-actin	15.92	15.85	15.88						β-actin	15.57	15.59	15.57
β-actin	16.01	15.89	16.12						β-actin	15.57	15.6	15.63
β-actin	16.11	15.9	15.95						β-actin	15.66	15.58	15.66
Figure 3C							Figure 3D							Figure 3E
Observation of respiratory function	TV(mL)	NC	OVA	OVA + sh-S100A8	OVA + sh-S100A9		Observation of respiratory function	VC(mL)	NC	OVA	OVA + sh-S100A8	OVA + sh-S100A9		Observation of respiratory function	EV(mL)	NC	OVA	OVA + sh-S100A8	OVA + sh-S100A9
	1	2.49701	1.78	2.48333	2.7109			1	2.28	2.21	2.32	2.74			1	2.22	2.07	2.23	2.63
	2	2.02038	1.86	2.52204	2.35017			2	2.65	1.99	2.88	2.96			2	2.74	1.8	2.61	2.83
	3	2.53194	2.06	2.69189	2.32049			3	2.72	2.07	2.81	2.47			3	2.61	1.98	2.61	2.52
	4	2.46808	2.07	2.55814	2.7245			4	2.34	1.71	2.53	2.44			4	2.12	1.81	2.68	2.26
	5	2.57935	1.88	2.15872	2.46708			5	2.48	1.77	2.49	2.38			5	2.31	1.75	2.4	2.69
	6	2.92244	2.28	2.62691	2.54731			6	2.76	2.38	2.48	2.69			6	2.58	2.23	2.88	2.56
Figure 3F							Figure 3G							Figure 3H
Observation of respiratory function	MV(mL)	NC	OVA	OVA + sh-S100A8	OVA + sh-S100A9		Observation of respiratory function	FEV0.1(mL)	NC	OVA	OVA + sh-S100A8	OVA + sh-S100A9		Observation of respiratory function	EIP(msec)	NC	OVA	OVA + sh-S100A8	OVA + sh-S100A9
	1	234.7	179.09	235.1	259.14			1	0.87	0.65	1	1.08			1	6.66	4.6	6.29	7.52
	2	215.1	155.42	231.67	219.28			2	1.2	0.76	1.05	1.16			2	6.16	5.08	6.72	6.86
	3	247.09	193.62	275.11	218.3			3	0.88	0.72	1.11	1.05			3	6.96	5.01	5.64	7.12
	4	215.98	186.2	225.71	234.91			4	0.92	0.86	1	0.98			4	6.5	4.64	7.49	6
	5	240.89	202.44	209.34	223.63			5	0.95	0.68	1	1.1			5	5.86	4.62	7.07	5.97
	6	202.65	180	251.1	277.57			6	1.02	0.67	0.94	0.78			6	6.17	5.68	6.86	6.45
Figure 3I							Figure 3J							Figure 3K
Observation of respiratory function	PEF(mL/s)	NC	OVA	OVA + sh-S100A8	OVA + sh-S100A9		Observation of respiratory function	EF50(mL/S)	NC	OVA	OVA + sh-S100A8	OVA + sh-S100A9		Observation of respiratory function	Cdyn(mL/cmH2O)	NC	OVA	OVA + sh-S100A8	OVA + sh-S100A9
	1	11.91	9.44	13.2	11.8			1	8.63	7.51	9.94	10.49			1	0.08	0.06	0.1	0.08
	2	13.8	10.04	11.82	13.39			2	8.59	7.31	8.85	9.31			2	0.07	0.06	0.09	0.08
	3	15.18	10.49	13.43	12.58			3	9.62	7.82	9.93	9.17			3	0.09	0.04	0.09	0.07
	4	13.26	10.29	12.93	12.51			4	8.51	6.43	9.4	8			4	0.07	0.06	0.08	0.08
	5	14.46	10.22	12.79	12.7			5	8.03	7.52	7.27	9.3			5	0.08	0.06	0.09	0.07
	6	12.72	9.05	13.99	12.83			6	8.23	6.11	9.61	8.75			6	0.08	0.05	0.08	0.09
Figure 3L							Figure 3N
ELISA	IgE (ng/mL)	NC	OVA	OVA + sh-S100A8	OVA + sh-S100A9		Wright-Giemsa staining	macrophages (10^4/mL)	NC	OVA	OVA + sh-S100A8	OVA + sh-S100A9
	1	54.1128	146.196	129.382	111.594			1	2.21	7.66	4.06	4.43
	2	60.2047	172.215	114.301	122.749			2	2.05	6.96	4.43	3.74
	3	61.8834	141.052	120.231	104.229			3	1.84	7.51	4.04	4.12
	4	55.7644	169.643	141.729	124.103			4	2.21	8.58	4.74	3.89
	5	58.5531	181.529	136.341	133.281			5	1.82	7.82	5.06	4.56
	6	64.2119	155.943	124.59	113.976			6	1.79	7.66	4.79	4.04
Figure 3O							Figure 3P							Figure 3Q
Wright-Giemsa staining	lymphocytes (10^4/mL)	NC	OVA	OVA + sh-S100A8	OVA + sh-S100A9		Wright-Giemsa staining	neutrophils (10^4/mL)	NC	OVA	OVA + sh-S100A8	OVA + sh-S100A9		Wright-Giemsa staining	eosinophils (10^4/mL)	NC	OVA	OVA + sh-S100A8	OVA + sh-S100A9
	1	0.54	5.4	3.41	3.42			1	0.17	4.19	2.65	2.62			1	0.08	2.26	1.93	1.76
	2	0.46	5.41	3.49	3.37			2	0.22	3.87	2.7	2.65			2	0.09	2.65	2.25	1.86
	3	0.55	5.69	3.07	2.81			3	0.19	3.76	2.76	2.76			3	0.11	2.91	1.84	1.95
	4	0.53	4.84	3.21	3.04			4	0.2	3.25	2.46	2.47			4	0.09	2.54	1.94	1.81
	5	0.49	5.33	3.34	3.11			5	0.22	3.43	2.9	2.35			5	0.1	2.97	2.13	1.73
	6	0.48	4.51	2.97	2.81			6	0.23	4.23	2.97	2.08			6	0.11	2.47	1.84	1.51
Figure 3R							Figure 3S							Figure 3T
ELISA	IL-4 (pg/mL)	NC	OVA	OVA + sh-S100A8	OVA + sh-S100A9		ELISA	IL-3 (pg/mL)	NC	OVA	OVA + sh-S100A8	OVA + sh-S100A9		ELISA	TGF-β1 (ng/mL)	NC	OVA	OVA + sh-S100A8	OVA + sh-S100A9
	1	14.9987	50.3809	45.5299	29.9763			1	10.7957	82.3518	53.5896	46.5469			1	163.985	493.894	277.483	289.204
	2	15.9992	46.8033	39.4661	34.13			2	11.5484	72.5135	65.3633	52.8907			2	166.784	570.303	322.445	258.938
	3	17.303	48.8043	42.6496	32.2805			3	10.8495	88.4806	58.4819	52.9982			3	164.816	565.186	318.683	265.237
	4	15.5141	47.7129	38.6172	36.6161			4	9.72048	76.9757	69.5029	53.2133			4	161.798	468.877	304.25	267.248
	5	12.937	54.8984	40.8911	30.613			5	12.6773	87.0291	59.0195	42.5148			5	140.586	489.083	265.586	280.02
	6	15.029	52.291	37.6773	29.097			6	11.5484	74.1801	60.5248	52.2993			6	179.949	500.805	311.992	212.008
Figure 3U							Figure 3V
ELISA	TNF-α (pg/mL)	NC	OVA	OVA + sh-S100A8	OVA + sh-S100A9		ELISA	IFN-g (pg/mL)	NC	OVA	OVA + sh-S100A8	OVA + sh-S100A9
	1	12.2281	59.1428	22.6893	28.9018			1	100.53	32.9579	61.3145	64.2539
	2	10.8714	56.4293	27.0452	21.9038			2	85.0718	29.7418	52.9113	76.6686
	3	10.8	59.4642	28.6518	17.0124			3	94.3741	36.5198	53.43	67.9195
	4	12.0139	68.8899	22.8321	20.9398			4	85.6597	32.8196	64.2539	74.6974
	5	9.40753	54.0372	24.2603	19.9401			5	83.2044	30.5026	54.5366	75.1124
	6	11.6569	52.7876	24.6173	19.5831			6	89.1524	31.5746	64.4614	67.8503

## Sheet: Figure 4
Figure 4 S100A8/9 knockdown suppressed macrophage polarization in ovalbumin-sensitized and challenged mice.
Figure 4B
flow cytometry		NC	OVA	OVA + sh-S100A8	OVA + sh-S100A9	flow cytometry		NC	OVA	OVA + sh-S100A8	OVA + sh-S100A9
CD11b+ F4/80+CD86+ (%)	1	10.8	21.9	15.2	13.5	CD11b+ F4/80+CD206+ (%)	1	9.21	35.3	27.8	24.3
	2	8.13	18	15.9	14		2	7.16	33	26.2	22.4
	3	9.94	19.3	16.8	15.5		3	8.03	31.6	25.1	24.3
Figure 4D
Immunohistochemistry	CD68 (cells/mm2)	NC	OVA	OVA + sh-S100A8	OVA + sh-S100A9	IRF-5+ (cells/mm2)	NC	OVA	OVA + sh-S100A8	OVA + sh-S100A9	YM-1 (cells/mm2)	NC	OVA	OVA + sh-S100A8	OVA + sh-S100A9
	1	12.2281	59.1428	22.6893	28.9018	1	20.649	47.1976	32.4484	32.4484	1	29.4985	53.0973	50.1475	47.1976
	2	10.8714	56.4293	27.0452	21.9038	2	23.5988	32.4484	38.3481	26.5487	2	32.4484	44.2478	38.3481	41.2979
	3	10.8	59.4642	28.6518	17.0124	3	11.7994	44.2478	29.4985	23.5988	3	23.5988	61.9469	47.1976	32.4484
	4	12.0139	68.8899	22.8321	20.9398	4	14.7493	47.1976	35.3982	35.3982	4	26.5487	53.0973	44.2478	38.3481
	5	9.40753	54.0372	24.2603	19.9401	5	14.7493	38.3481	44.2478	38.3481	5	35.3982	50.1475	38.3481	32.4484
Figure 4E										Figure 4F
qRT-PCR	NC	OVA	OVA + sh-S100A8	OVA + sh-S100A9	amplification curve		melting curve			qRT-PCR	NC	OVA	OVA + sh-S100A8	OVA + sh-S100A9	amplification curve		melting curve
IL-6	25.24	24.24	24.74	25.72						iNOS	23.57	22.12	24.52	25.17
IL-6	25.32	24.11	24.74	25.79						iNOS	23.88	22.37	24.74	25.14
IL-6	25.37	24.18	24.78	25.71						iNOS	23.83	22.17	24.3	25.18
β-actin	15.57	15.59	15.63	15.57						β-actin	15.57	15.59	15.63	15.57
β-actin	15.57	15.6	15.39	15.63						β-actin	15.57	15.6	15.39	15.63
β-actin	15.66	15.58	15.62	15.66						β-actin	15.66	15.58	15.62	15.66
Figure 4G										Figure 4H
qRT-PCR	NC	OVA	OVA + sh-S100A8	OVA + sh-S100A9	amplification curve		melting curve			qRT-PCR	NC	OVA	OVA + sh-S100A8	OVA + sh-S100A9	amplification curve		melting curve
Arg1	24.9	20.78	21.78	23.89			#VALUE!			IL-10	18.71	20.97	19.3	19.9
Arg1	24.67	20.74	21.81	23.65						IL-10	19	20.91	19.3	20
Arg1	24.92	20.86	21.73	23.7						IL-10	18.82	20.99	19.34	20.04
β-actin	15.57	15.59	15.63	15.57						β-actin	15.57	15.59	15.63	15.57
β-actin	15.57	15.6	15.39	15.63						β-actin	15.57	15.6	15.39	15.63
β-actin	15.66	15.58	15.62	15.66						β-actin	15.66	15.58	15.62	15.66

## Sheet: Figure 5
Figure 5 S100A8/9 knockdown inhibited glycolysis in ovalbumin-sensitized and challenged mouse lung tissue.
Figure 5A							Figure 5B										Figure 5C
ELISA	LA(μmol/μg prot)	NC	OVA	OVA + sh-S100A8	OVA + sh-S100A9		qRT-PCR	NC	OVA	OVA + sh-S100A8	OVA + sh-S100A9	amplification curve		melting curve			qRT-PCR	NC	OVA	OVA + sh-S100A8	OVA + sh-S100A9	amplification curve		melting curve
	1	11.761	29.7524	24.287	20.4611		PDH	21.83	21.25	22.02	22.8			#VALUE!			LDHA	24.24	22.94	23.41	23.89
	2	11.1713	36.044	20.8311	22.478		PDH	21.81	21.2	22.27	22.85						LDHA	24.22	22.92	23.41	23.8
	3	12.244	31.2564	27.0056	22.8351		PDH	21.79	21.27	21.97	22.76						LDHA	24.29	22.96	23.41	23.89
	4	9.98468	29.8747	26.5169	17.6832		β-actin	15.61	15.55	15.39	15.3						β-actin	15.61	15.55	15.39	15.3
	5	9.52638	29.4291	25.3679	20.9885		β-actin	15.61	15.46	15.48	15.61						β-actin	15.61	15.46	15.48	15.61
	6	9.4324	28.1832	25.133	18.8657		β-actin	15.55	15.77	15.38	15.58						β-actin	15.55	15.77	15.38	15.58
Figure 5D
qRT-PCR	NC	OVA	OVA + sh-S100A8	OVA + sh-S100A9	amplification curve		melting curve
HK-2	22.5	20.99	21.23	21.96
HK-2	22.52	20.99	21.28	21.99
HK-2	22.54	20.94	21.22	21.88
β-actin	15.61	15.55	15.39	15.3
β-actin	15.61	15.46	15.48	15.61
β-actin	15.55	15.77	15.38	15.58
Figure 5E						Figure 5F
Western blot	NC	OVA	OVA + sh-S100A8	OVA + sh-S100A9		Western blot	NC	OVA	OVA + sh-S100A8	OVA + sh-S100A9
LDHA/β-actin	0.496494	1.21398	0.857299	0.635876		HK2/β-actin	0.370195	1.23812	0.673161	0.604233
LDHA/β-actin	0.670125	1.15026	0.800563	0.776352		HK2/β-actin	0.373149	1.12078	0.564885	0.49919
LDHA/β-actin	0.41281	1.0503	0.674795	0.609802		HK2/β-actin	0.319732	1.17673	0.66194	0.587667
Figure 5G						Figure 5H
Western blot	NC	OVA	OVA + sh-S100A8	OVA + sh-S100A9		Western blot	NC	OVA	OVA + sh-S100A8	OVA + sh-S100A9
TLR4/β-actin	0.482008	1.08022	0.690451	0.573528		MyD88/β-actin	0.407156	1.15649	0.847863	0.565308
TLR4/β-actin	0.388752	1.07975	0.76011	0.681386		MyD88/β-actin	0.343139	1.28548	0.912761	0.547805
TLR4/β-actin	0.245821	1.04145	0.641582	0.527516		MyD88/β-actin	0.386849	1.22447	0.834587	0.469588
Figure 5I						Figure 5J
Western blot	NC	OVA	OVA + sh-S100A8	OVA + sh-S100A9		Western blot	NC	OVA	OVA + sh-S100A8	OVA + sh-S100A9
p-NF-kB/NF-kB	0.576524	0.891382	0.731114	0.599542		p-IKBα/IKBα	0.324782	1.09471	0.726738	0.652605
p-NF-kB/NF-kB	0.687099	0.985891	0.732118	0.659277		p-IKBα/IKBα	0.335786	0.88184	0.600066	0.489404
p-NF-kB/NF-kB	0.476648	1.0871	0.821303	0.574011		p-IKBα/IKBα	0.493048	1.09853	0.780285	0.682132
Figure 5K						Figure 5K
Western blot	NC	OVA	OVA + sh-S100A8	OVA + sh-S100A9		Western blot	NC	OVA	OVA + sh-S100A8	OVA + sh-S100A9
Gasdermin D-N/β-actin	0.249251	0.808376	0.45705	0.424875		cleaved-caspase-1/caspase-1	0.588934	1.10587	0.783773	0.739605
Gasdermin D-N/β-actin	0.279076	0.770857	0.421257	0.344293		cleaved-caspase-1/caspase-1	0.295937	1.03902	0.453997	0.38163
Gasdermin D-N/β-actin	0.331032	0.963986	0.466117	0.418836		cleaved-caspase-1/caspase-1	0.519179	1.27722	0.759674	0.728211

## Sheet: Figure 6
Figure 6 S100A9 overexpression had an adverse impact on respiratory function and lung tissue while enhancing inflammation in ovalbumin-sensitized and challenged mice.
Figure 6A											Figure 6B
qRT-PCR	OVA	OVA +3-BP	OVA + OE-S100A9	OVA + OE-S100A9 + 3-BP	amplification curve		melting curve				ELISA	IgE (ng/mL)	OVA	OVA +3-BP	OVA + OE-S100A9	OVA + OE-S100A9 + 3-BP
S100A9	22.84	22.93	21.23	21.39								1	173.032	98.7043	333.818	194.958
S100A9	22.82	22.95	21.22	21.35								2	147.495	115.455	278.763	213.328
S100A9	22.74	22.92	21.23	21.39								3	171.121	113.809	296.07	181.261
β-actin	15.47	15.53	15.49	15.54								4	158.963	112.349	275.604	218.504
β-actin	15.56	15.59	15.5	15.62								5	157.635	109.402	310.166	209.266
β-actin	15.53	15.56	15.53	15.66								6	167.218	115.667	288.186	185.163
Figure 6C							Figure 6D							Figure 6E
Observation of respiratory function	TV(mL)	OVA	OVA +3-BP	OVA + OE-S100A9	OVA + OE-S100A9 + 3-BP		Observation of respiratory function	VC(mL)	OVA	OVA +3-BP	OVA + OE-S100A9	OVA + OE-S100A9 + 3-BP		Observation of respiratory function	EV(mL)	OVA	OVA +3-BP	OVA + OE-S100A9	OVA + OE-S100A9 + 3-BP
	1	1.82	2.51	1.49	2.33			1	2.22	2.33	1.56	2.08			1	2.03	2.19	1.4	2.02
	2	1.9	2.04	1.56	1.97			2	1.99	2.9	1.66	2.3			2	1.76	2.73	1.78	2.12
	3	2.12	2.55	1.7	1.93			3	2.09	2.83	1.74	1.8			3	1.96	2.57	1.37	1.92
	4	2.1	2.48	1.6	2.34			4	1.72	2.54	1.54	1.76			4	1.8	2.07	1.68	1.64
	5	1.93	2.62	1.19	2.11			5	1.79	2.5	1.42	1.9			5	1.72	2.29	1.59	2.06
	6	2.33	2.93	1.64	2.16			6	2.39	2.48	1.55	2.01			6	2.12	2.55	1.56	1.92
Figure 6F							Figure 6G							Figure 6H
Observation of respiratory function	MV(mL)	OVA	OVA +3-BP	OVA + OE-S100A9	OVA + OE-S100A9 + 3-BP		Observation of respiratory function	FEV0.1(mL)	OVA	OVA +3-BP	OVA + OE-S100A9	OVA + OE-S100A9 + 3-BP		Observation of respiratory function	EIP(msec)	OVA	OVA +3-BP	OVA + OE-S100A9	OVA + OE-S100A9 + 3-BP
	1	198.03	250.06	154.78	170.96			1	0.66	1.09	0.52	0.8			1	4.74	7.37	4.24	5.57
	2	170.92	253.59	150.6	178.53			2	0.77	1.4	0.57	0.91			2	4.67	7.35	5.09	5.84
	3	162.97	207.81	156.11	206.44			3	0.73	1.09	0.63	0.76			3	5.67	7.49	3.92	4.93
	4	191.61	216.39	152.88	205.65			4	0.87	1.12	0.51	0.7			4	5.5	6.77	4.79	5.84
	5	207.26	241.9	136.18	200.93			5	0.7	1.16	0.51	0.8			5	5.56	6.57	3.81	6.42
	6	181.62	214.24	125.65	175.56			6	0.69	1.23	0.45	0.69			6	5.68	7.29	4.96	5.39
Figure 6I							Figure 6J							Figure 6K
Observation of respiratory function	PEF(mL/s)	OVA	OVA +3-BP	OVA + OE-S100A9	OVA + OE-S100A9 + 3-BP		Observation of respiratory function	EF50(mL/S)	OVA	OVA +3-BP	OVA + OE-S100A9	OVA + OE-S100A9 + 3-BP		Observation of respiratory function	Cdyn(mL/cmH2O)	OVA	OVA +3-BP	OVA + OE-S100A9	OVA + OE-S100A9 + 3-BP
	1	9.01	10.67	6.85	9.86			1	8.36	10.22	6.51	6.68			1	0.07	0.09	0.02	0.07
	2	10.04	12.89	6.88	12.01			2	8.15	10.44	5.77	7.13			2	0.08	0.1	0.03	0.07
	3	11.04	13.57	6.53	10.65			3	8.74	10.38	5.64	6.99			3	0.06	0.11	0.06	0.06
	4	10.27	12.18	6.58	11.17			4	6.53	9.36	5.25	7.34			4	0.06	0.08	0.04	0.07
	5	10.23	12.41	6.46	10.99			5	9.03	8.62	5.74	8.42			5	0.07	0.09	0.03	0.06
	6	7.76	12.16	8.69	10.63			6	6.41	10.69	6.62	7.83			6	0.06	0.09	0.06	0.08
Figure 6M							Figure 6N							Figure 6O							Figure 6P
Wright-Giemsa staining	macrophages (10^4/mL)	OVA	OVA +3-BP	OVA + OE-S100A9	OVA + OE-S100A9 + 3-BP		Wright-Giemsa staining	lymphocytes (10^4/mL)	OVA	OVA +3-BP	OVA + OE-S100A9	OVA + OE-S100A9 + 3-BP		Wright-Giemsa staining	neutrophils (10^4/mL)	OVA	OVA +3-BP	OVA + OE-S100A9	OVA + OE-S100A9 + 3-BP		Wright-Giemsa staining	eosinophils (10^4/mL)	OVA	OVA +3-BP	OVA + OE-S100A9	OVA + OE-S100A9 + 3-BP
	1	7.77	3.2	12.16	10.79			1	5.68	2.59	9.57	6.22			1	4.42	1.71	7.52	6.55			1	2.89	0.95	3.5	2.34
	2	8.3	3.78	13.77	10.49			2	4.97	2.24	8.97	6.02			2	3.72	1.72	7.54	6.01			2	2.55	1.02	3.64	2.13
	3	7.8	3.38	12.75	9.92			3	5.09	2.57	8.12	6.31			3	4.65	1.81	7.14	7.04			3	2.33	0.89	3.05	2.7
	4	8.43	3.09	14.87	11.62			4	5.26	2.41	8.44	5.36			4	3.8	2.13	8.94	6.23			4	2.4	0.91	3.57	2.54
	5	6.37	2.99	13.42	12.64			5	5.37	2.6	9.28	6.58			5	3.93	1.88	8.07	7.76			5	2.77	1.02	3.93	2.42
	6	7.27	3.74	14.85	10.95			6	5.61	2.17	10.03	4.41			6	4.17	1.7	8.24	6.38			6	2.56	0.85	3.59	2.53
Figure 6Q							Figure 6R							Figure 6S
ELISA	IL-4 (pg/mL)	OVA	OVA +3-BP	OVA + OE-S100A9	OVA + OE-S100A9 + 3-BP		ELISA	IL-3 (pg/mL)	OVA	OVA +3-BP	OVA + OE-S100A9	OVA + OE-S100A9 + 3-BP		ELISA	TGF-β1 (ng/mL)	OVA	OVA +3-BP	OVA + OE-S100A9	OVA + OE-S100A9 + 3-BP
	1	49.7836	30.3808	66.4103	56.4038			1	73.1875	67.9844	104.459	91.3176			1	495.316	205.333	614.687	426.878
	2	58.6308	33.9502	65.8612	58.3563			2	89.0111	68.9499	85.7927	86.5973			2	568.009	237.095	659.654	427.756
	3	53.6886	35.9637	62.9019	54.2072			3	90.4057	71.5246	99.6854	78.8196			3	516.023	178.09	666.454	405.864
	4	46.6108	39.3195	61.8036	50.2412			4	85.5245	58.973	101.67	72.812			4	582.399	229.857	622.189	393.23
	5	44.4143	38.5263	68.9424	54.1157			5	78.9269	75.494	101.992	89.8694			5	551.558	225.294	572.528	369.233
	6	49.326	39.7771	58.5698	62.5053			6	72.3829	69.8618	91.6395	84.5054			6	463.773	217.836	544.67	429.028
Figure 6T							Figure 6U
ELISA	TNF-α (pg/mL)	OVA	OVA +3-BP	OVA + OE-S100A9	OVA + OE-S100A9 + 3-BP		ELISA	IFN-g (pg/mL)	OVA	OVA +3-BP	OVA + OE-S100A9	OVA + OE-S100A9 + 3-BP
	1	62.168	16.3265	80.3545	45.0176			1	35.1633	83.7194	25.0068	50.5371
	2	58.1662	13.7897	78.4965	36.5139			2	28.7981	84.6585	24.9721	39.0241
	3	65.9553	16.5409	69.2068	39.7296			3	37.7024	73.4238	21.3895	49.2153
	4	65.6695	14.004	76.853	38.5148			4	36.2763	79.8238	24.2764	48.6588
	5	57.7375	15.7905	65.0264	36.5853			5	31.8937	92.0323	29.4242	39.7545
	6	48.7692	13.7539	71.4935	42.3021			6	30.0851	84.1368	25.3199	44.4154

## Sheet: Figure 7
Figure 7 S100A9 overexpression promoted macrophage polarization in ovalbumin-sensitized and challenged mice.
Figure 7B
flow cytometry		OVA	OVA +3-BP	OVA + OE-S100A9	OVA + OE-S100A9 + 3-BP	flow cytometry		OVA	OVA +3-BP	OVA + OE-S100A9	OVA + OE-S100A9 + 3-BP
CD11b+ F4/80+CD86+ (%)	1	18.4	10.6	28.2	22.6	CD11b+ F4/80+CD206+ (%)	1	34.4	18.9	39.6	34.8
	2	18.3	11.6	24.1	19.5		2	29.4	19.8	43.1	33.7
	3	20.8	12.4	25.3	20.9		3	31.3	21.1	37.6	32.8
Figure 7D
Immunohistochemistry	CD68 (cells/mm2)	OVA	OVA +3-BP	OVA + OE-S100A9	OVA + OE-S100A9 + 3-BP	IRF-5+ (cells/mm2)	OVA	OVA +3-BP	OVA + OE-S100A9	OVA + OE-S100A9 + 3-BP	YM-1 (cells/mm2)	OVA	OVA +3-BP	OVA + OE-S100A9	OVA + OE-S100A9 + 3-BP
	1	82.5959	53.0973	100.295	56.0472	1	32.4484	20.649	58.9971	41.2979	1	53.0973	32.4484	67.8466	53.0973
	2	70.7965	35.3982	91.4454	50.1475	2	29.4985	26.5487	53.0973	38.3481	2	44.2478	23.5988	61.9469	44.2478
	3	47.1976	32.4484	85.5457	56.0472	3	44.2478	23.5988	61.9469	32.4484	3	61.9469	20.649	64.8968	53.0973
	4	76.6962	41.2979	82.5959	64.8968	4	47.1976	17.6991	47.1976	44.2478	4	64.8968	29.4985	73.7463	47.1976
	5	79.646	50.1475	91.4454	61.9469	5	38.3481	29.4985	56.0472	47.1976	5	50.1475	35.3982	76.6962	41.2979
Figure 7E										Figure 7F
qRT-PCR	OVA	OVA +3-BP	OVA + OE-S100A9	OVA + OE-S100A9 + 3-BP	amplification curve		melting curve			qRT-PCR	OVA	OVA +3-BP	OVA + OE-S100A9	OVA + OE-S100A9 + 3-BP	amplification curve		melting curve
IL-6	24	24.89	23.25	23.91						iNOS	24.26	24.71	23.42	23.89
IL-6	24.27	24.77	23.18	23.9						iNOS	24.17	24.97	23.31	23.85
IL-6	24.22	24.68	23.16	23.74						iNOS	24.11	25.01	23.3	23.71
β-actin	15.47	15.53	15.49	15.54						β-actin	15.47	15.53	15.49	15.54
β-actin	15.56	15.59	15.5	15.62						β-actin	15.56	15.59	15.5	15.62
β-actin	15.53	15.56	15.53	15.66						β-actin	15.53	15.56	15.53	15.66
Figure 7G										Figure 7H
qRT-PCR	OVA	OVA +3-BP	OVA + OE-S100A9	OVA + OE-S100A9 + 3-BP	amplification curve		melting curve			qRT-PCR	OVA	OVA +3-BP	OVA + OE-S100A9	OVA + OE-S100A9 + 3-BP	amplification curve		melting curve
Arg1	24.15	25.26	23.23	24.9			#VALUE!			IL-10	19.46	18.65	20.55	19.1
Arg1	24.13	25.41	23.1	24.87						IL-10	19.44	18.51	20.56	19.02
Arg1	24.1	25.26	23.2	24.8						IL-10	19.49	18.28	20.58	19.03
β-actin	15.47	15.53	15.49	15.54						β-actin	15.47	15.53	15.49	15.54
β-actin	15.56	15.59	15.5	15.62						β-actin	15.56	15.59	15.5	15.62
β-actin	15.53	15.56	15.53	15.66						β-actin	15.53	15.56	15.53	15.66

## Sheet: Figure 8
Figure 8 S100A9 overexpression inhibited glycolysis in ovalbumin-sensitized mouse lung tissue.
Figure 8A
ELISA	LA(μmol/μg prot)	OVA	OVA +3-BP	OVA + OE-S100A9	OVA + OE-S100A9 + 3-BP
	1	35.491	10.7193	51.8662	50.7892
	2	29.2587	10.4117	50.674	42.5439
	3	28.9991	12.97	60.3738	44.559
	4	33.8858	12.9614	50.0819	51.5918
	5	32.4016	12.0344	58.0371	42.1984
	6	28.3927	12.9017	59.6873	49.3604
Figure 8B										Figure 8C										Figure 8D
qRT-PCR	OVA	OVA +3-BP	OVA + OE-S100A9	OVA + OE-S100A9 + 3-BP	amplification curve		melting curve			qRT-PCR	OVA	OVA +3-BP	OVA + OE-S100A9	OVA + OE-S100A9 + 3-BP	amplification curve		melting curve			qRT-PCR	OVA	OVA +3-BP	OVA + OE-S100A9	OVA + OE-S100A9 + 3-BP	amplification curve		melting curve
PDH	22.71	24.68	21.74	22.56			#VALUE!			LDHA	18.76	20.61	17.77	19.09						HK2	22.66	24.36	21.8	23.78
PDH	22.81	24.77	21.86	22.84						LDHA	18.78	20.46	17.81	19.01						HK2	22.65	24.3	21.81	23.76
PDH	22.83	24.75	21.57	22.85						LDHA	18.74	20.54	17.65	19.05						HK2	22.54	24.4	21.78	23.7
β-actin	15.58	15.44	15.59	15.63						β-actin	15.58	15.44	15.59	15.63						β-actin	15.58	15.44	15.59	15.63
β-actin	15.63	15.62	15.44	15.68						β-actin	15.63	15.62	15.44	15.68						β-actin	15.63	15.62	15.44	15.68
β-actin	15.71	15.73	15.69	15.38						β-actin	15.71	15.73	15.69	15.38						β-actin	15.71	15.73	15.69	15.38
Figure 8E						Figure 8F
Western blot	OVA	OVA +3-BP	OVA + OE-S100A9	OVA + OE-S100A9 + 3-BP		Western blot	OVA	OVA +3-BP	OVA + OE-S100A9	OVA + OE-S100A9 + 3-BP
LDHA/β-actin	1.06997	0.558069	1.4357	1.05922		HK2/β-actin	1.23522	0.593354	1.50307	0.986012
LDHA/β-actin	1.01716	0.592908	1.39486	1.07555		HK2/β-actin	0.996524	0.343045	1.44548	0.765861
LDHA/β-actin	1.02158	0.436824	1.36767	1.07633		HK2/β-actin	1.23166	0.546064	1.46364	0.956726
Figure 8G						Figure 8H
Western blot	OVA	OVA +3-BP	OVA + OE-S100A9	OVA + OE-S100A9 + 3-BP		Western blot	OVA	OVA +3-BP	OVA + OE-S100A9	OVA + OE-S100A9 + 3-BP
TLR4/β-actin	0.975805	0.526376	1.19547	0.872395		MyD88/β-actin	1.09489	0.689534	1.32387	0.988831
TLR4/β-actin	1.03258	0.611927	1.29366	0.827818		MyD88/β-actin	1.21354	0.783403	1.5405	0.920241
TLR4/β-actin	1.0063	0.510582	1.27174	0.903402		MyD88/β-actin	1.14827	0.452594	1.50131	0.993328
Figure 8I						Figure 8J
Western blot	OVA	OVA +3-BP	OVA + OE-S100A9	OVA + OE-S100A9 + 3-BP		Western blot	OVA	OVA +3-BP	OVA + OE-S100A9	OVA + OE-S100A9 + 3-BP
p-NF-kB/NF-kB	1.02287	0.314032	1.12418	0.955847		p-IKBα/IKBα	0.839319	0.793902	0.953534	0.811275
p-NF-kB/NF-kB	1.00922	0.447218	1.15766	1.01877		p-IKBα/IKBα	0.926762	0.852434	1.01469	0.861987
p-NF-kB/NF-kB	1.06042	0.445465	1.18886	0.936492		p-IKBα/IKBα	0.805379	0.657035	0.915341	0.73986
Figure 8K						Figure 8K
Western blot	OVA	OVA +3-BP	OVA + OE-S100A9	OVA + OE-S100A9 + 3-BP		Western blot	OVA	OVA +3-BP	OVA + OE-S100A9	OVA + OE-S100A9 + 3-BP
Gasdermin D-N/β-actin	0.800308	0.520538	1.27219	0.798915		cleaved-caspase-1/caspase-1	1.08689	0.380722	1.55684	1.13742
Gasdermin D-N/β-actin	0.986465	0.517125	1.31681	1.00398		cleaved-caspase-1/caspase-1	1.03044	0.53074	1.54317	1.0732
Gasdermin D-N/β-actin	0.930857	0.518695	1.36356	1.09336		cleaved-caspase-1/caspase-1	1.14745	0.591173	1.58083	1.25622
