# Supplementary material for: S100A8/9 modulates perturbation and glycolysis of macrophages in allergic asthma mice
Source: PeerJ. 2024 Apr 18;12:e17106. doi: 10.7717/peerj.17106 (PMC11032659; doi:10.7717/peerj.17106)
Supplement: Supplemental Information 5 [file peerj-12-17106-s005.xls]

## Sheet: Sheet1
ITEM TO CHECK	IMPORTANCE	CHECKLIST
EXPERIMENTAL DESIGN
Definition of experimental and control groups	E	lines 126-132 and 152-156
Number within each group	E	lines 132-133 and 153
Assay carried out by core lab or investigator's lab?	D
Acknowledgement of authors' contributions	D
SAMPLE
Description	E	line 169
Volume/mass of sample processed	D
Microdissection or macrodissection	E	lines 169-170
Processing procedure	E
If frozen - how and how quickly?	E	lines 166 and 169-176
If fixed - with what, how quickly?	E
Sample storage conditions and duration (especially for FFPE samples)	E	lines 173-174
NUCLEIC ACID EXTRACTION
Procedure and/or instrumentation	E	lines 169-181
Name of kit and details of any modifications	E	lines 169-181
Source of additional reagents used	D	lines 169-181
Details of DNase or RNAse treatment	E	lines 170-171
Contamination assessment (DNA or RNA)	E	line 172-174
Nucleic acid quantification	E	line 172-174
Instrument and method	E	line 172-174
Purity (A260/A280)	D
Yield	D
RNA integrity method/instrument	E	line 172
RIN/RQI or Cq of 3' and 5' transcripts	E	Upload as an attachment and name it as "supplementary files 2-Raw Data20231023"
Electrophoresis traces	D
Inhibition testing (Cq dilutions, spike or other)	E	Standard curve
REVERSE TRANSCRIPTION
Complete reaction conditions	E	Upload as an supplementary file and name it as "reaction conditions and reagent ratio"
Amount of RNA and reaction volume	E	Upload as an supplementary file and name it as "reaction conditions and reagent ratio"
Priming oligonucleotide (if using GSP) and concentration	E	Upload as an supplementary file and name it as "reaction conditions and reagent ratio"
Reverse transcriptase and concentration	E	Upload as an supplementary file and name it as "reaction conditions and reagent ratio"
Temperature and time	E	Upload as an supplementary file and name it as "reaction conditions and reagent ratio"
Manufacturer of reagents and catalogue numbers	D
Cqs with and without RT	D*
Storage conditions of cDNA	D
qPCR TARGET INFORMATION
If multiplex, efficiency and LOD of each assay.	E	LOD of SYBR kits are 10 copy number and efficiency (E) is shown in "qRT-PCR_Standard curve"
Sequence accession number	E	Table 1
Location of amplicon	D
Amplicon length	E	Table 1
In silico specificity screen (BLAST, etc)	E	BLAST
Pseudogenes, retropseudogenes or other homologs?	D
Sequence alignment	D
Secondary structure analysis of amplicon	D
Location of each primer by exon or intron (if applicable)	E	Not Applicable
What splice variants are targeted?	E	Not Applicable
qPCR OLIGONUCLEOTIDES
Primer sequences	E	Table 1
RTPrimerDB Identification Number	D
Probe sequences	D**
Location and identity of any modifications	E	No modifications
Manufacturer of oligonucleotides	D
Purification method	D
qPCR PROTOCOL
Complete reaction conditions	E	Upload as an supplementary file and name it as "reaction conditions and reagent ratio"
Reaction volume and amount of cDNA/DNA	E	Upload as an supplementary file and name it as "reaction conditions and reagent ratio"
Primer, (probe), Mg++ and dNTP concentrations	E	Upload as an supplementary file and name it as "reaction conditions and reagent ratio"
Polymerase identity and concentration	E	Upload as an supplementary file and name it as "reaction conditions and reagent ratio"
Buffer/kit identity and manufacturer	E	lines 169-174
Exact chemical constitution of the buffer	D
Additives (SYBR Green I, DMSO, etc.)	E	lines 169-174
Manufacturer of plates/tubes and catalog number	D
Complete thermocycling parameters	E	Upload as an attachment and name it as "reaction conditions and reagent ratio"
Reaction setup (manual/robotic)	D
Manufacturer of qPCR instrument	E	lines 177
qPCR VALIDATION
Evidence of optimisation (from gradients)	D
Specificity (gel, sequence, melt, or digest)	E	The melting curve is shown in the supplementary files 2-Raw data
For SYBR Green I, Cq of the NTC	E	Standard curves is shown in a supplementary file, named "qRT-PCR_Standard curve"
Standard curves with slope and y-intercept	E	Standard curves is shown in a supplementary file, named "qRT-PCR_Standard curve"
PCR efficiency calculated from slope	E	Standard curves is shown in a supplementary file, named "qRT-PCR_Standard curve"
Confidence interval for PCR efficiency or standard error	D
r2 of standard curve	E	Standard curves is shown in a supplementary file, named "qRT-PCR_Standard curve"
Linear dynamic range	E	Standard curves is shown in a supplementary file, named "qRT-PCR_Standard curve"
Cq variation at lower limit	E	Standard curves is shown in a supplementary file, named "qRT-PCR_Standard curve"
Confidence intervals throughout range	D
Evidence for limit of detection	E	Standard curves is shown in a supplementary file, named "qRT-PCR_Standard curve"
If multiplex, efficiency and LOD of each assay.	E	LOD of SYBR kits are 10 copy number and efficiency (E) is shown in "qRT-PCR_Standard curve"
DATA ANALYSIS
qPCR analysis program (source, version)	E	line 179
Cq method determination	E	line 179
Outlier identification and disposition	E	If the SD is too large, qPCR will be performed again.
Results of NTCs	E	line 179
Justification of number and choice of reference genes	E	line 178
Description of normalisation method	E	line 179
Number and concordance of biological replicates	D	n=3
Number and stage (RT or qPCR) of technical replicates	E	3
Repeatability (intra-assay variation)	E	n=3
Reproducibility (inter-assay variation, %CV)	D
Power analysis	D
Statistical methods for result significance	E	the one-way analysis of variance (ANOVA) with post hoc Tukey test.
Software (source, version)	E	SPSS 19.0 (IBM, Armonk, NY, USA)
Cq or raw data submission using RDML	D	Upload as an attachment and name it as "supplementary files 2-Raw Data20231023"
Table 1. MIQE checklist for authors, reviewers and editors. All essential information (E) must be submitted with the manuscript. Desirable
information (D) should be submitted if available. If using primers obtained from RTPrimerDB, information on qPCR target, oligonucleotides,
protocols and validation is available from that source.
*: Assessing the absence of DNA using a no RT assay is essential when first extracting RNA. Once the sample has been validated as
RDNA-free, inclusion of a no-RT control is desirable, but no longer essential.
**: Disclosure of the probe sequence is highly desirable and strongly encouraged. However, since not all commercial pre-designed assay
vendors provide this information, it cannot be an essential requirement. Use of such assays is advised against.
