# Supplementary material for: S100A8/9 modulates perturbation and glycolysis of macrophages in allergic asthma mice
Source: PeerJ. 2024 Apr 18;12:e17106. doi: 10.7717/peerj.17106 (PMC11032659; doi:10.7717/peerj.17106)
Supplement: Supplemental Information 6 [file peerj-12-17106-s006.xlsx]

## Sheet: Fig. 1, 4, 7
IL-1β
Standard curve	Cq	Lg (copy number)
T1	8.6867	6.613
T2	10.4967	5.613
T3	14.4	4.613
T4	18.0663	3.613
T5	20.8223	2.613
T6	24.9533	1.613
Y =			29.8664	+	-3.31361	X
r =			-0.996046
E=			1.00348
IL-6
Standard curve	Cq	Lg (copy number)
T1	10.67	6.613
T2	14.44	5.613
T3	17.4467	4.613
T4	20.1267	3.613
T5	24.98	2.613
T6	27.5933	1.613
Y =			33.1839	+	-3.39762	X
r =			-0.997066
E=			0.969354
IL-10
Standard curve	Cq	Lg (copy number)
T1	13.74	6.613
T2	17.4533	5.613
T3	20.74	4.613
T4	23.98	3.613
T5	26.7867	2.613
T6	29.5767	1.613
Y =			35.0225	+	-3.15496	X
r =			-0.998503
E=			1.07473
iNOS
Standard curve	Cq	Lg (copy number)	#VALUE!
T1	7.6433	8.613
T2	10.435	7.613
T3	13.225	6.613
T4	16.9667	5.613
T5	19.6632	4.613
T6	24.25	3.613
Y =			35.3551	+	-3.27028	X
r =			-0.996454
E=			1.02201
Arg 1
Standard curve	Cq	Lg (copy number)	#VALUE!
T1	11.8033	6.613
T2	14.5033	5.613
T3	18.2833	4.613
T4	21.95	3.613
T5	24.65	2.613
T6	27.52	1.613
Y =			33.0277	+	-3.21972	X
r =			-0.998271
E=			1.04449
Fizzl
Standard curve	Cq	Lg (copy number)	#VALUE!
T1	10.1467	6.613
T2	13.2567	5.613
T3	16.9567	4.613
T4	19.6867	3.613
T5	22.4867	2.613
T6	26.52	1.613
Y =			31.3709	+	-3.20819	X
r =			-0.998547
E=			1.04976

## Sheet: Fig. 2, 5, 8
GAPDH
Standard curve	Cq	Lg (copy number)	#VALUE!
T1	10.1337	6.613
T2	13.5433	5.613
T3	16.6763	4.613
T4	19.9967	3.613
T5	22.7033	2.613
T6	25.9333	1.613
Y =			31.0673	+	-3.1371	X
r =			-0.99956
E=			1.08337
HK2
Standard curve	Cq	Lg (copy number)	#VALUE!
T1	11.6003	6.613
T2	14.29	5.613
T3	18.2237	4.613
T4	21.9635	3.613
T5	25.0043	2.613
T6	27.31	1.613
Y =			33.1793	+	-3.26946	X
r =			-0.996931
E=			1.02237
LDHA
Standard curve	Cq	Lg (copy number)	#VALUE!
T1	11.0867	6.613
T2	14.66	5.613
T3	18.3667	4.613
T4	22.8333	3.613
T5	25.2567	2.613
T6	27.9567	1.613
Y =			34.1997	+	-3.4459	X
r =			-0.995707
E=			0.950741
PDH
Standard curve	Cq	Lg (copy number)	#VALUE!
T1	10.2467	6.613
T2	14.0633	5.613
T3	18.1733	4.613
T4	21.2433	3.613
T5	24.3667	2.613
T6	27.5233	1.613
Y =			33.4139	+	-3.43895	X
r =			-0.998173
E=			0.953377

## Sheet: Fig. 3, 6
S100A8
Standard curve	Cq	Lg (copy number)	#VALUE!
T1	12.4853	6.613
T2	17.1937	5.613
T3	20.2167	4.613
T4	23.0037	3.613
T5	26.44	2.613
T6	29.1467	1.613
Y =			34.7913	+	-3.25237	X
r =			-0.996145
E=			1.02987
S100A9
Standard curve	Cq	Lg (copy number)	#VALUE!
T1	15.5637	6.613
T2	19.7633	5.613
T3	22.88	4.613
T4	26.77	3.613
T5	29.39	2.613
T6	31.4567	1.613
Y =			37.4932	+	-3.20671	X
r =			-0.993956
E=			1.05043
