# Supplementary material for: S100A8/9 modulates perturbation and glycolysis of macrophages in allergic asthma mice
Source: PeerJ. 2024 Apr 18;12:e17106. doi: 10.7717/peerj.17106 (PMC11032659; doi:10.7717/peerj.17106)
Supplement: Supplemental Information 7 [file peerj-12-17106-s007.xlsx]

## Sheet: Reverse transcription
Reverse transcription reaction conditions: 42 °C for 15 min, 85 °C for 5 min.
Components	Volume (μL)
dNTP Mix，2.5 mM Each	4 μL
Primer Mix	2μL
RNA Template	X μL
5×RT Buffer	4μL
DTT，0.1 M	2ul
HiFiScript，200 U/μl	1ul
RNase Free ddH2O	Up to 20 μL

## Sheet: qRT-PCR
qPCR conditions: 95 ℃, 10 min; 95 ℃ for 15 s; 60 ℃, 60s; 40 cycles
Components	Volume (μL)
2×UltraSYBR Mixture (Low ROX)	10 μL
PCR Forward Primer(10μM)	1 μL
PCR Reverse Primer(10μM)	1 μL
cDNA	2 μL
ddH2O	6μL
Total	Up to 20 μL
